# Supplementary material for: One-step generation of complete gene knockout mice and monkeys by CRISPR/Cas9-mediated gene editing with multiple sgRNAs
Source: PubMed Central journal article supplement (PMC5518993; doi:10.1038/cr.2017.81), 2017-06-06
Supplement: cr201781x2.pdf [file cr201781x2.pdf]

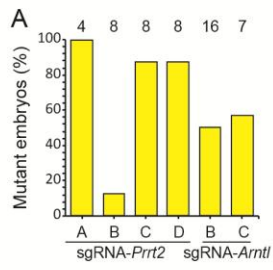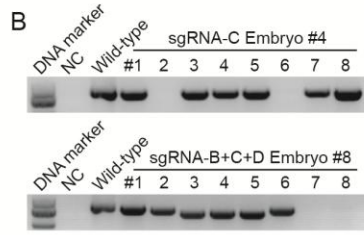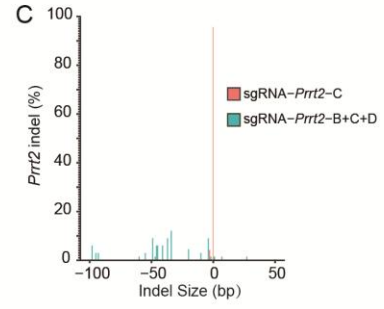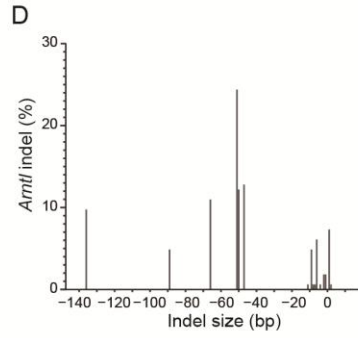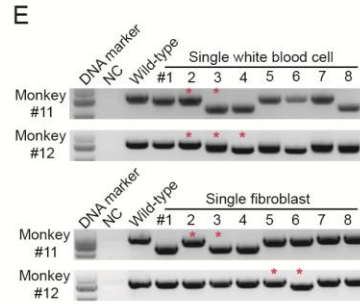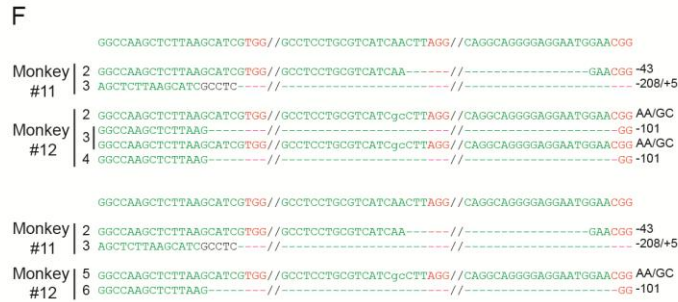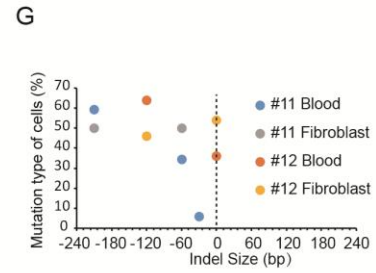

**Supplementary information, Figure S2.** Genotyping analysis of gene-edited monkey embryos and tissues by C-CRISPR.

(A) Cleavage efficiency of each sgRNA used for *Prrt2* and *Arntl* targeting. Zygotes were injected with *Cas9* mRNA and single sgRNA, and then cultured into 8-cell embryos for genotyping. Number, total embryos used for genotyping.

(B) PCR products from blastomeres of embryo #4 with sgRNA-*Prrt2*-C and blastomeres of embryo #8 with sgRNA-*Prrt2*-B+C+D targeting. PCR products of blastomeres were TA cloned and sequenced.

(C & D) Size distribution of deletions or insertions in embryos with *Prrt2* and *Arntl* targeting. Data was from total alleles analyzed from blastomeres of 8-cell embryos with *Prrt2* targeting (C) and total TA clones sequenced from 8-cell embryos with *Arntl* targeting (D).

(E & F) Representative PCR products and sequences from single fibroblasts and blood cells of monkey #11 and #12. PCR products of the single cells marked with \* were further sequenced and shown.

(G) Size distribution of deletions or insertions in blood cells and fibroblasts with *Prrt2* editing.
