# Supplementary material for: One-step generation of complete gene knockout mice and monkeys by CRISPR/Cas9-mediated gene editing with multiple sgRNAs
Source: PubMed Central journal article supplement (PMC5518993; doi:10.1038/cr.2017.81), 2017-06-06
Supplement: cr201781x3.pdf [file cr201781x3.pdf]

**A**

| sgRNA-Tyr-B     |                             |            |             | sgRNA-Tyr-C     |                             |            |             |
|-----------------|-----------------------------|------------|-------------|-----------------|-----------------------------|------------|-------------|
| locus           | guide sequence              | PAM        |             | locus           | guide sequence              | PAM        |             |
| Target sequence | <u>GCGAAGGCACCGCCCTCTTT</u> | <u>TGG</u> | indel (n=6) | Target sequence | <u>CCAGAAGCCAATGCACCTAT</u> | <u>CGG</u> | indel (n=6) |
| chr17:57065718  | GGGAAGGCAACACCCCTCTTT       | GGG        | 0/6         | chr8:73203311   | CTAGAAGCCAATGCACCTAA        | GGG        | 0/6         |
| chr6:138140489  | GCGCTGGCACCGCCCTTTT         | CAG        | 0/6         | chr10:55107975  | CCAGAAATCCAATGCTCTAT        | TAG        | 0/6         |
| chr4:138750107  | GTGCGGACACCGCCCTCTTT        | TAG        | 0/6         | chr10:116978236 | CCGGAAATCCAATGCACCTAC       | AAG        | 0/6         |
| chr2:32395585   | TATAAGGCCCGCCCTCTTT         | CGG        | 0/6         | chr10:124330321 | CCCAAAGTAAATGCACCTAT        | CAG        | 0/6         |
| chr9:23096850   | GGGAAGGACTCGCCCTCTTT        | CAG        | 0/6         | chr17:8532910   | TTAGAAGCAATGCACCTAC         | AAG        | 0/6         |
| chr17:24453551  | TGGAAGGCACCAACCCCTCTTT      | CAG        | 0/6         | chr16:57712501  | CCCAAAGCCCTTGCACCTAT        | GAG        | 0/6         |
| chr9:96832929   | TGGAAGGTACCTCCCTCTTT        | GAG        | 0/6         | chr17:44031368  | ATACAAGCCAATGCACATAT        | GAG        | 0/6         |
| chr15:79169441  | GCTCTGGCACCGCCCTGTTT        | CAG        | 0/6         | chr3:6828323    | ACAGAAATGAAATGCACCTAT       | AGG        | 0/6         |
| chr4:86233378   | GCGAAGGCACCGCCCTCTCTC       | AGG        | 0/6         | chr11:28415232  | ACAGAAACATTCACCTAT          | CAG        | 0/6         |
| chr6:115975395  | TGGAAGGCTCCTCCCTCTTT        | CAG        | 0/6         | chr1:33799882   | TGAGCAGCCAATGCACCTTT        | TGG        | 0/6         |

| sgRNA-Tyr-D     |                             |            |             | sgRNA-Tyr-E     |                             |            |             |
|-----------------|-----------------------------|------------|-------------|-----------------|-----------------------------|------------|-------------|
| locus           | guide sequence              | PAM        |             | locus           | guide sequence              | PAM        |             |
| Target sequence | <u>CTTCATAACATCCAAGGATC</u> | <u>TGG</u> | indel (n=6) | Target sequence | <u>TACAGCTACCTCCAAGAGTC</u> | <u>AGG</u> | indel (n=6) |
| chr15:74536351  | CTGGCTAGCATCCAAGGATC        | AGG        | 0/6         | chr8:108702504  | TACAGCTACCTCCAAGAGTT        | TGG        | 0/6         |
| chr18:43788370  | CTTTCAACATCCAAGGATC         | CAG        | 0/6         | chrX:130677312  | CACAGTACCTCTAAGAGTC         | TAG        | 0/6         |
| chr15:61581619  | CTTCCAACCTCCAAGGATC         | AGG        | 0/6         | chr3:130295069  | AACAGCTTCCAACCAAGAGTC       | TGG        | 0/6         |
| chr12:39330053  | GCAATAACGTCCAAGGATC         | AGG        | 0/6         | chr3:133082201  | GGCTGCTCCCTCCAAGAGTC        | TGG        | 0/6         |
| chr14:80206603  | CTTCTTGAATCCAAGGATC         | CGG        | 0/6         | chrX:147311924  | TGATGCTGCCCTCCAAGAGTC       | AGG        | 0/6         |
| chr5:36335565   | CCTATAAATCCAAGGATG          | CAG        | 0/6         | chr1:168151597  | TATAGCTGCCCTCAAAGAGTC       | AGG        | 0/6         |
| chr8:85681387   | CTTAATAACACCCAAGGATA        | TGG        | 0/6         | chr5:50071052   | TTACAGCAGCTTCCAAGAGTC       | AAG        | 0/6         |
| chr3:98944708   | CATCATAAATCCAAGCATC         | AAG        | 0/6         | chr2:7777791    | GACAGCTATCTCCAAGAGTC        | TGG        | 0/6         |
| chr6:42584574   | TTGCTTAACATGCAAGGATC        | AAG        | 0/6         | chr10:84425609  | TACCCTGCGCAACCAAGAGTC       | TGG        | 0/6         |
| chr10:18410911  | CTTCTATCCCAAGGATC           | CAG        | 0/6         |                 |                             |            |             |

**B**

| sgRNA-Prnt2-B   |                             |            |             | sgRNA-Prnt2-C   |                             |            |             |
|-----------------|-----------------------------|------------|-------------|-----------------|-----------------------------|------------|-------------|
| locus           | guide sequence              | PAM        |             | locus           | guide sequence              | PAM        |             |
| Target sequence | <u>GGCCAAGCTCTTAAGCATCG</u> | <u>TGG</u> | indel (n=2) | Target sequence | <u>GCCTCCTGCGTCATCAACTT</u> | <u>AGG</u> | indel (n=2) |
| chr8:8862302    | GTTTAAGCAGTTAAGCATCG        | TGG        | 0/2         | chr5:72228276   | TCTCCCTGCTTCATCAACTT        | AGG        | 0/2         |
| chr7:142439417  | GGCCCTCCCTGTTAAGCATCG       | GGG        | 0/2         | chr1:190035638  | AAGGCCTGCTTCATCAACTT        | GGG        | 0/2         |
| chr16:18400530  | GGCCCTCCCTGTTAAGCATCG       | GGG        | 0/2         | chr9:69194244   | GGCACCTGCGCATCAACTT         | TGG        | 0/2         |
| chr3:1322473581 | TGCCAAGCTCTTAACCATCA        | TGG        | 0/2         | chr15:40107119  | GCTTAATGCATCATCAACTT        | GGG        | 0/2         |
| chr17:9980144   | TGGCCAGATCTTAAGCATCC        | AGG        | 0/2         | chr20:61058621  | GCCTCCAGCATCATCACTT         | GGG        | 0/2         |
| chr10:63847987  | TGGAAGCTGTTAAGCATCA         | CGG        | 0/2         | chr10:85811043  | GAGTCCTTCGTTCATCAACTT       | GGG        | 0/2         |
| chr8:42993888   | GGAAAGATATTAAGCATCA         | AGG        | 0/2         |                 |                             |            |             |

| sgRNA-Prnt2-D   |                             |            |             |
|-----------------|-----------------------------|------------|-------------|
| locus           | guide sequence              | PAM        |             |
| Target sequence | <u>CAGGCAGGGGAGGAATGGAA</u> | <u>CGG</u> | indel (n=2) |
| chr3:88667957   | AAGCCAGTGGAGGAATGGAA        | GGG        | 0/2         |
| chr7:96903885   | GAGGGAGGGAGGAATGGAA         | GGG        | 0/2         |
| chr3:10010150   | GAGGGAGGGAGGAATGGAA         | TGG        | 0/2         |
| chr2:37733632   | GAGGGAGGTGAGGAATGGAA        | CGG        | 0/2         |
| chr12:127960318 | CAGACAGAGGAGGAATGGAT        | GGG        | 0/2         |

**C**

| sgRNA-Prnt2-C | GCCTCCTGCGTCATCAACTTAGG |            |
|---------------|-------------------------|------------|
| v5.0          | CCCTCCTGCTTCAGCCTCTTGAG |            |
| WGS #11       | ---TCCTGCTTCAGCCTCTTGAG | 8/27 reads |
| #8            | CTCTCCTGCTTCAGCCTCTTGAG |            |
| #9            | CTCTCCTGCTTCAGCCTCTTGAG |            |
| #11           | CTCTCCTGCTTCAGCCTCTTGAG |            |
| #12           | CTCTCCTGCTTCAGCCTCTTGAG |            |

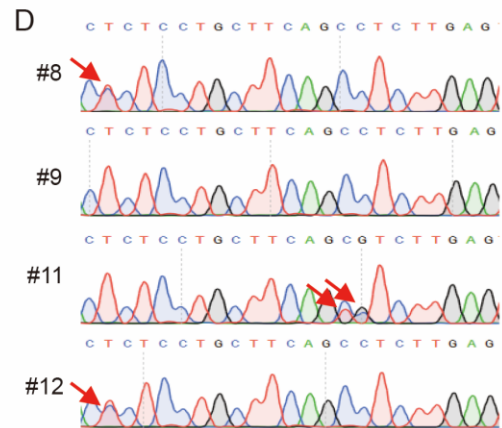

**Supplementary information, Figure S3.** Off-target analysis of mice resulting from *Tyr* targeting and monkeys resulting from *Prrt2* targeting.

(A) Six mice from sgRNA-*Tyr*-B+C+D+E targeting were used for off-target analysis. Up to 10 potential off-target sites for each sgRNA were selected for analysis. DNA sequencing of PCR products amplified from these genomic sites were TA cloned and sequenced. Red, mismatch with targeted sequence.

(B) Two live monkeys with multiple sgRNA-*Prrt2*-A+B+C targeting (#11, #12) were used for off-target analysis. The off-target sites with up to three mismatches for each sgRNA were selected for analysis. Red, mismatch with targeted sequence.

(C&D) Sequence analysis of the off-target site in monkey #11. DNA samples from monkey #8, #9, #11 and #12 were amplified and sequenced. Red arrow, bimodal sequence.
