# Supplementary material for: One-step generation of complete gene knockout mice and monkeys by CRISPR/Cas9-mediated gene editing with multiple sgRNAs
Source: PubMed Central journal article supplement (PMC5518993; doi:10.1038/cr.2017.81), 2017-06-06
Supplement: cr201781x4.pdf [file cr201781x4.pdf]

**Supplementary information, Table S1.** Phenotypic analysis of F0 mice with Y-chromosome gene deletions generated by C-CRISPR

| Gene           | Sample | Concentration (M/mL) | Testis/body weight (g) | Motile Sperm (%) | Progressive Sperm (%) | Reproduction | Genotype |
|----------------|--------|----------------------|------------------------|------------------|-----------------------|--------------|----------|
| WT             | #1     | 9.1                  | 0.403                  | 76               | 64                    |              | WT       |
| WT             | #1     | 15.4                 | 0.376                  | 74               | 59                    |              |          |
| WT             | #2     | 22.5                 | 0.360                  | 80               | 67                    |              | WT       |
| WT             | #2     | 9.2                  | 0.339                  | 70               | 61                    |              |          |
| <i>Eif2s3y</i> | #1     | 0.5                  | 0.061                  | 0.0              | 0.0                   |              | Pure KO  |
| <i>Eif2s3y</i> | #1     | 0.4                  | 0.057                  | 0.0              | 0.0                   |              |          |
| <i>Eif2s3y</i> | #2     | 2.3                  | 0.053                  | 0.0              | 0.0                   |              | Pure KO  |
| <i>Eif2s3y</i> | #2     | 3.3                  | 0.052                  | 0.0              | 0.0                   |              |          |
| <i>Eif2s3y</i> | #3     | 2.7                  | 0.052                  | 0.0              | 0.0                   |              | Pure KO  |
| <i>Eif2s3y</i> | #3     | 1.9                  | 0.048                  | 0.0              | 0.0                   |              |          |
| <i>Eif2s3y</i> | #4     |                      |                        |                  |                       | Infertility  | Pure KO  |
| <i>Eif2s3y</i> | #4     |                      |                        |                  |                       |              |          |
| <i>Eif2s3y</i> | #5     |                      |                        |                  |                       | Infertility  | Pure KO  |
| <i>Eif2s3y</i> | #5     |                      |                        |                  |                       |              |          |
| <i>Eif2s3y</i> | #6     |                      |                        |                  |                       | Infertility  | Pure KO  |
| <i>Eif2s3y</i> | #6     |                      |                        |                  |                       |              |          |
| <i>Zfy1</i>    | #1     | 20.6                 | 0.318                  | 70               | 62                    |              | Pure KO  |
| <i>Zfy1</i>    | #1     | 8.2                  | 0.269                  | 68.0             | 55.0                  |              |          |
| <i>Zfy1</i>    | #2     | 26.5                 | 0.322                  | 78               | 64                    |              | Pure KO  |
| <i>Zfy1</i>    | #2     | 14.0                 | 0.333                  | 76               | 64                    |              |          |
| <i>Zfy1</i>    | #3     | 14.7                 | 0.333                  | 75               | 63                    |              | Pure KO  |
| <i>Zfy1</i>    | #3     | 19.5                 | 0.309                  | 73               | 61                    |              |          |
| <i>Zfy1</i>    | #4     |                      |                        |                  |                       | Fertility    | Pure KO  |
| <i>Zfy1</i>    | #4     |                      |                        |                  |                       |              |          |
| <i>Zfy1</i>    | #5     |                      |                        |                  |                       | Fertility    | Pure KO  |
| <i>Zfy1</i>    | #5     |                      |                        |                  |                       |              |          |
| <i>Zfy1</i>    | #6     |                      |                        |                  |                       | Fertility    | Pure KO  |
| <i>Zfy1</i>    | #6     |                      |                        |                  |                       |              |          |
| <i>Ube1y1</i>  | #1     | 6.6                  | 0.338                  | 64               | 50                    |              | Pure KO  |
| <i>Ube1y1</i>  | #1     | 22                   | 0.349                  | 74               | 59                    |              |          |
| <i>Ube1y1</i>  | #2     | 23.1                 | 0.311                  | 70               | 57                    |              | Pure KO  |
| <i>Ube1y1</i>  | #2     | 23.1                 | 0.330                  | 61               | 48                    |              |          |
| <i>Ube1y1</i>  | #3     |                      |                        |                  |                       | Fertility    | Pure KO  |
| <i>Ube1y1</i>  | #3     |                      |                        |                  |                       |              |          |
| <i>Ube1y1</i>  | #4     |                      |                        |                  |                       | Fertility    | Pure KO  |
| <i>Ube1y1</i>  | #4     |                      |                        |                  |                       |              |          |
| <i>Ube1y1</i>  | #5     |                      |                        |                  |                       | Fertility    | Pure KO  |
| <i>Ube1y1</i>  | #5     |                      |                        |                  |                       |              |          |

|              |     |      |       |      |      |  |  |           |
|--------------|-----|------|-------|------|------|--|--|-----------|
| <i>Kdm5d</i> | #1  |      | 0.230 |      |      |  |  |           |
| <i>Kdm5d</i> | #1  |      | 0.264 |      |      |  |  | Pure KO   |
| <i>Kdm5d</i> | #2  |      | 0.231 |      |      |  |  | Pure KO   |
| <i>Kdm5d</i> | #2  |      | 0.246 |      |      |  |  |           |
| <i>Kdm5d</i> | #3  | 14.7 | 0.292 | 73.0 | 60.0 |  |  | Pure KO   |
| <i>Kdm5d</i> | #3  | 14.7 | 0.306 | 75.0 | 62.0 |  |  |           |
| <i>Kdm5d</i> | #4  | 19.9 | 0.280 | 69.0 | 55.0 |  |  | Pure KO   |
| <i>Kdm5d</i> | #4  | 9.2  | 0.321 | 61.0 | 48.0 |  |  |           |
| <i>Kdm5d</i> | #5  | 24.3 | 0.329 | 72.0 | 58.0 |  |  | Pure KO   |
| <i>Kdm5d</i> | #5  | 10.8 | 0.335 | 74.0 | 61.0 |  |  |           |
| <i>Kdm5d</i> | #6  | 8.5  | 0.276 | 73.0 | 63.0 |  |  | Pure KO   |
| <i>Kdm5d</i> | #6  | 19.3 | 0.253 | 68.0 | 55.0 |  |  |           |
| <i>Kdm5d</i> | #7  | 4.1  | 0.220 | 77.0 | 69.0 |  |  | Pure KO   |
| <i>Kdm5d</i> | #7  | 1.6  | 0.223 | 55.0 | 48.0 |  |  |           |
| <i>Kdm5d</i> | #8  | 13.3 | 0.255 | 75.0 | 58.0 |  |  | Pure KO   |
| <i>Kdm5d</i> | #8  | 6.4  | 0.241 | 75.0 | 63.0 |  |  |           |
| <i>Kdm5d</i> | #9  |      |       |      |      |  |  | Fertility |
| <i>Kdm5d</i> | #9  |      |       |      |      |  |  | Pure KO   |
| <i>Kdm5d</i> | #10 |      |       |      |      |  |  | Fertility |
| <i>Kdm5d</i> | #10 |      |       |      |      |  |  | Pure KO   |
| <i>Kdm5d</i> | #11 |      |       |      |      |  |  | Fertility |
| <i>Kdm5d</i> | #11 |      |       |      |      |  |  | Pure KO   |
| <i>Ddx3y</i> | #1  | 14.4 | 0.294 | 73.0 | 61.0 |  |  | Pure KO   |
| <i>Ddx3y</i> | #1  | 13.3 | 0.293 | 75.0 | 62.0 |  |  |           |
| <i>Ddx3y</i> | #2  | 4.1  | 0.224 | 56.0 | 44.0 |  |  | Pure KO   |
| <i>Ddx3y</i> | #2  | 7    | 0.214 | 58.0 | 48.0 |  |  |           |
| <i>Ddx3y</i> | #3  | 0.3  | 0.056 | 0    | 0    |  |  | Pure KO   |
| <i>Ddx3y</i> | #3  | 2    | 0.054 | 0    | 0    |  |  |           |
| <i>Ddx3y</i> | #4  | 4.8  | 0.244 | 80   | 71   |  |  | Pure KO   |
| <i>Ddx3y</i> | #4  | 10.6 | 0.236 | 74   | 65   |  |  |           |
| <i>Ddx3y</i> | #5  | 9    | 0.252 | 81   | 64   |  |  | Pure KO   |
| <i>Ddx3y</i> | #5  | 8.9  | 0.227 | 77   | 62   |  |  |           |
| <i>Ddx3y</i> | #6  |      |       |      |      |  |  | Fertility |
| <i>Ddx3y</i> | #6  |      |       |      |      |  |  | Pure KO   |
| <i>Ddx3y</i> | #7  |      |       |      |      |  |  | Fertility |
| <i>Ddx3y</i> | #7  |      |       |      |      |  |  | Pure KO   |
| <i>Ddx3y</i> | #8  |      |       |      |      |  |  | Fertility |
| <i>Ddx3y</i> | #8  |      |       |      |      |  |  | Pure KO   |
| <i>Usp9y</i> | #1  | 18.3 | 0.323 | 70.0 | 56.0 |  |  | Pure KO   |
| <i>Usp9y</i> | #1  | 16.4 | 0.306 | 72.0 | 59.0 |  |  |           |
| <i>Usp9y</i> | #2  | 5.8  | 0.361 | 72.0 | 61.0 |  |  | Pure KO   |
| <i>Usp9y</i> | #2  | 24.1 | 0.358 | 76.0 | 60.0 |  |  |           |

|              |    |      |       |      |      |           |
|--------------|----|------|-------|------|------|-----------|
| <i>Usp9y</i> | #3 | 22.1 | 0.343 | 72.0 | 60.0 | Pure KO   |
| <i>Usp9y</i> | #3 | 14   | 0.347 | 69.0 | 57.0 |           |
| <i>Usp9y</i> | #4 | 24   | 0.328 | 73.0 | 59.0 | Pure KO   |
| <i>Usp9y</i> | #4 | 17.2 | 0.354 | 73.0 | 60.0 |           |
| <i>Usp9y</i> | #5 |      |       |      |      | Fertility |
| <i>Usp9y</i> | #5 |      |       |      |      |           |
| <i>Usp9y</i> | #6 |      |       |      |      | Fertility |
| <i>Usp9y</i> | #6 |      |       |      |      |           |
| <i>Usp9y</i> | #7 |      |       |      |      | Fertility |
| <i>Usp9y</i> | #7 |      |       |      |      |           |

WT, wild type.

Pure KO, mice with complete knockout mutations.

Related to Figure 2.
