# Supplementary material for: One-step generation of complete gene knockout mice and monkeys by CRISPR/Cas9-mediated gene editing with multiple sgRNAs
Source: PubMed Central journal article supplement (PMC5518993; doi:10.1038/cr.2017.81), 2017-06-06
Supplement: cr201781x5.pdf [file cr201781x5.pdf]

**Supplementary information, Table S2.** Summary of HiSeq X Ten sequencing

| <b>Sample</b>     | <b>Species</b> | <b>Treatment</b>                  | <b>Accession</b> | <b>Mapped bases (Gbp)</b> | <b>Coverage</b> |
|-------------------|----------------|-----------------------------------|------------------|---------------------------|-----------------|
| <i>Prrt2</i> -#8  | Monkey         | SgRNA-<br><i>Prrt2</i> -A         | SRR527332<br>7   | 56.80                     | 19.54           |
| <i>Prrt2</i> -#9  | Monkey         | SgRNA-<br><i>Prrt2</i> -A         | SRR527332<br>6   | 59.46                     | 20.45           |
| <i>Prrt2</i> -#11 | Monkey         | SgRNA-<br><i>Prrt2</i> -<br>B+C+D | SRR500414<br>3   | 72.89                     | 25.07           |
| <i>Prrt2</i> -#12 | Monkey         | SgRNA-<br><i>Prrt2</i> -<br>B+C+D | SRR500414<br>6   | 67.90                     | 23.35           |
| <i>Tyr</i> -#1    | Mouse          | SgRNA-<br><i>Tyr</i> -<br>B+C+D+E | SRR500414<br>7   | 45.43                     | 16.31           |
| <i>Tyr</i> -#2    | Mouse          | SgRNA-<br><i>Tyr</i> -<br>B+C+D+E | SRR500414<br>5   | 47.94                     | 17.21           |
| <i>Tyr</i> -#3    | Mouse          | SgRNA-<br><i>Tyr</i> -<br>B+C+D+E | SRR500414<br>8   | 45.90                     | 16.48           |
| <i>Tyr</i> -#4    | Mouse          | SgRNA-<br><i>Tyr</i> -<br>B+C+D+E | SRR500414<br>9   | 49.93                     | 17.93           |
| <i>Tyr</i> -#5    | Mouse          | SgRNA-<br><i>Tyr</i> -<br>B+C+D+E | SRR500414<br>2   | 45.97                     | 16.50           |
| <i>Tyr</i> -#6    | Mouse          | SgRNA-<br><i>Tyr</i> -<br>B+C+D+E | SRR500414<br>4   | 46.85                     | 16.82           |
