# Supplementary material for: One-step generation of complete gene knockout mice and monkeys by CRISPR/Cas9-mediated gene editing with multiple sgRNAs
Source: PubMed Central journal article supplement (PMC5518993; doi:10.1038/cr.2017.81), 2017-06-06
Supplement: cr201781x7.pdf [file cr201781x7.pdf]

**Supplementary information, Table S4. sgRNA sequences and primers**

## sgRNA sequences

| Locus            | Sequence (5'-3')         | Figure |
|------------------|--------------------------|--------|
| <i>GFP-A</i>     | AAGGGCGAGGAGCTGTTACCCGG  | 1      |
| <i>GFP-B</i>     | CTGAAGTTCATCTGCACCACCGG  | 1      |
| <i>GFP-C</i>     | GGAGCGCACCATCTTCTCAAGG   | 1      |
| <i>GFP-D</i>     | GGTGAACCGCATCGAGCTGAAGG  | 1      |
| <i>Tyr-A</i>     | GGGAAGGGTTACTCAGAGTCAGG  | 2      |
| <i>Tyr-B</i>     | GCGAAGGCACCGCCCTCTTTTGG  | 2      |
| <i>Tyr-C</i>     | CCAGAAGCCAATGCACCTATCGG  | 2      |
| <i>Tyr-D</i>     | CTTCATAACATCCAAGGATCTGG  | 2      |
| <i>Tyr-E</i>     | TACAGCTACCTCCAAGAGTCAGG  | 2      |
| <i>Tyr-F</i>     | CAATGTGGGTAACCTCTTTGGGG  | 2      |
| <i>Tet1-A</i>    | GGCATGCTGGACTTCATTCTCGG  | 3      |
| <i>Tet1-B</i>    | GATGTCCATGCCGGTTACACAGG  | 3      |
| <i>Tet1-C</i>    | GAAGCCAGAGGCCACCTCACAGG  | 3      |
| <i>Tet2-A</i>    | CAGGGAGCAAGAGATTCCGAAGG  | 3      |
| <i>Tet2-B</i>    | TCAGTCCTCCACTCTCAGACCGG  | 3      |
| <i>Tet2-C</i>    | GTGAACCAAGGACCGTCTCCAGG  | 3      |
| <i>Tet3-A</i>    | CCCTACTTCCACAGAGCTCAGG   | 3      |
| <i>Tet3-B</i>    | GCCTGTTAGGCAGATTGTTCTGG  | 3      |
| <i>Tet3-C</i>    | ACAAGCTGGAGGAGCTCATCCGG  | 3      |
| <i>Zfy1-A</i>    | GGATAGTGACCAGATTGTTGTGG  | 4      |
| <i>Zfy1-B</i>    | CCTGAGCAAGTTCTCAATTTAGG  | 4      |
| <i>Ubely1-A</i>  | GAAACCCCTACTTGCCTCGCTGG  | 4      |
| <i>Ubely1-B</i>  | CTCAGCACAGCAGGCCTCCTCGG  | 4      |
| <i>Kdm5d-A</i>   | GATGGTACCTACAGAAGTTGTGG  | 4      |
| <i>Kdm5d-B</i>   | GGACTTATCTCCTGAAGAAAAGG  | 4      |
| <i>Eif2s3y-A</i> | ACAATTGGTCATGTTGCTCATGG  | 4      |
| <i>Eif2s3y-B</i> | AGGAATATTACCATAAACTTGG   | 4      |
| <i>Ddx3y-A</i>   | GTCTGTGATAAGGACAGTTCAGG  | 4      |
| <i>Ddx3y-B</i>   | GTGATCGTGGAAGTGGATCCAGG  | 4      |
| <i>Usp9y-A</i>   | ACTCTGGCTCTGTGTTCCAGG    | 4      |
| <i>Usp9y-B</i>   | AGGATTAGACTACCTTTGGAAGG  | 4      |
| <i>Sry-A</i>     | GCATTTATGGTGTGGTCCCGTGG  | 4      |
| <i>Sry-B</i>     | CGAAAAAAGGCCCTTTTTCCAGG  | 4      |
| <i>Erdr1-A</i>   | ACGGACGACTCCACAAGGTAGG   | 4      |
| <i>Erdr1-B</i>   | TGGCACATACATCTTGACCGCGG  | 4      |
| <i>Prri2-A</i>   | GATGGCAGCCAGCAGCTCTGAGG  | 5      |
| <i>Prri2-B</i>   | GGCCAAGCTCTTAAGCATCGTGG  | 5      |
| <i>Prri2-C</i>   | GCCTCCTGCGTCATCAACTTAGG  | 5      |
| <i>Prri2-D</i>   | CAGGCAGGGGAGGAATGGAACCGG | 5      |

|                |                         |   |
|----------------|-------------------------|---|
| <i>ArntL-A</i> | GCTGGCCACCCACAAAGATGGGG | 5 |
| <i>ArntL-B</i> | GCAGTCGTCCAATTGCAACGAGG | 5 |
| <i>ArntL-C</i> | GTTTCTCGGCACGCGATAGATGG | 5 |

Primer sequences used to generate the templates for sgRNA *in vitro* transcriptions.

| Locus            | Sequence (5'-3')                                                 | Figure |
|------------------|------------------------------------------------------------------|--------|
| <i>GFP-A</i>     | TAATACGACTCACTATAGGGAAGGGCGAGGAGCTGTTTCACGTTTATAGAGCTAGAAATAG    | 1      |
| <i>GFP-B</i>     | TAATACGACTCACTATAGGGCTGAAGTTCATCTGCACCACGTTTATAGAGCTAGAAATAG     | 1      |
| <i>GFP-C</i>     | TAATACGACTCACTATAGGGGGAGCGCACCATCTTCTTCAGTTTATAGAGCTAGAAATAG     | 1      |
| <i>GFP-D</i>     | TAATACGACTCACTATAGGGGGTGAACCGCATCGAGCTGAGTTTATAGAGCTAGAAATAG     | 1      |
| <i>Tyr-A</i>     | TAATACGACTCACTATAGGGGGGAAGGGTTACTCAGAGTCGTTTATAGAGCTAGAAATAG     | 2      |
| <i>Tyr-B</i>     | TAATACGACTCACTATAGGGGGCAAGGCACCGCCCTCTTTGTTTTAGAGCTAGAAATAG      | 2      |
| <i>Tyr-C</i>     | TAATACGACTCACTATAGGGCCAGAAGCCAATGCACCTATGTTTTAGAGCTAGAAATAG      | 2      |
| <i>Tyr-D</i>     | TAATACGACTCACTATAGGGCTTCATAACATCCAAGGATCGTTTATAGAGCTAGAAATAG     | 2      |
| <i>Tyr-E</i>     | TAATACGACTCACTATAGGGTACAGCTACCTCCAAGAGTCGTTTATAGAGCTAGAAATAG     | 2      |
| <i>Tyr-F</i>     | TAATACGACTCACTATAGGGCAATGTGGGTAACCTCTTTGGTTTTAGAGCTAGAAATAG      | 2      |
| <i>Tet1-A</i>    | TAATACGACTCACTATAGGGGGCATGCTGGACTTCATCTGTTTATAGAGCTAGAAATAG      | 3      |
| <i>Tet1-B</i>    | TAATACGACTCACTATAGGGGATGTCCATGCCGTTTACACGTTTATAGAGCTAGAAATAG     | 3      |
| <i>Tet1-C</i>    | TAATACGACTCACTATAGGGGAAGCCAGAGGCCACCTCACGTTTATAGAGCTAGAAATAG     | 3      |
| <i>Tet2-A</i>    | TAATACGACTCACTATAGGGCAGGGAGCAAGAGATCCGAGTTTATAGAGCTAGAAATAG      | 3      |
| <i>Tet2-B</i>    | TAATACGACTCACTATAGGGTCAGTCCTCCACTCTCAGACGTTTATAGAGCTAGAAATAG     | 3      |
| <i>Tet2-C</i>    | TAATACGACTCACTATAGGGGTGAACCAAGGACCGTCTCCGTTTATAGAGCTAGAAATAG     | 3      |
| <i>Tet3-A</i>    | TAATACGACTCACTATAGGGCCCTACTTCCACAGAGCCTCGTTTATAGAGCTAGAAATAG     | 3      |
| <i>Tet3-B</i>    | TAATACGACTCACTATAGGGGCCTGTAGGCAGATTGTTCGTTTATAGAGCTAGAAATAG      | 3      |
| <i>Tet3-C</i>    | TAATACGACTCACTATAGGGACAAGCTGGAGGAGCTCATCGTTTATAGAGCTAGAAATAG     | 3      |
| <i>Zfy1-A</i>    | TAATACGACTCACTATAGGGGGATAGTGACCAGATTGTTGGTTTTAGAGCTAGAAATAG      | 4      |
| <i>Zfy1-B</i>    | TAATACGACTCACTATAGGGCCTGAGCAAGTTCTCAATTTGTTTTAGAGCTAGAAATAG      | 4      |
| <i>Ube1y1-A</i>  | TAATACGACTCACTATAGGGGAAACCCCTACTTGCCTCGCGTTTTAGAGCTAGAAATAG      | 4      |
| <i>Ube1y1-B</i>  | TAATACGACTCACTATAGGGCTCAGCACAGCAGGCCTCCTGTTTTAGAGCTAGAAATAG      | 4      |
| <i>Kdm5d-A</i>   | TAATACGACTCACTATAGGGGATGGTACCTACAGAAGTTGGTTTTAGAGCTAGAAATAG      | 4      |
| <i>Kdm5d-B</i>   | TAATACGACTCACTATAGGGGGACTTATCTCCTGAAGAAAGTTTTAGAGCTAGAAATAG      | 4      |
| <i>Eif2s3y-A</i> | TAATACGACTCACTATAGGGACAATTGGTCATGTTGCTCAGTTTTAGAGCTAGAAATAG      | 4      |
| <i>Eif2s3y-B</i> | TAATACGACTCACTATAGGGAGGAATATTACCATAAACTGTTTTAGAGCTAGAAATAG       | 4      |
| <i>Ddx3y-A</i>   | TAATACGACTCACTATAGGGGTCTGTGATAAGGACAGTTCGTTTTAGAGCTAGAAATAG      | 4      |
| <i>Ddx3y-B</i>   | TAATACGACTCACTATAGGGGTGATCGTGGAAGTGGATCCGTTTTAGAGCTAGAAATAG      | 4      |
| <i>Usp9y-A</i>   | TAATACGACTCACTATAGGGACTCTGGCTCTGTGTTCCCGTTTTAGAGCTAGAAATAG       | 4      |
| <i>Usp9y-B</i>   | TAATACGACTCACTATAGGGAGGATTAGACTACCTTTGGAGTTTTAGAGCTAGAAATAG      | 4      |
| <i>Sry-A</i>     | TAATACGACTCACTATAGGGGCATTTATGGTGTGGTCCCGTTTTAGAGCTAGAAATAG       | 4      |
| <i>Sry-B</i>     | TAATACGACTCACTATAGGGCGAAAAAAGGCCCTTTTTCCGTTTTAGAGCTAGAAATAG      | 4      |
| <i>Erd1-A</i>    | TAATACGACTCACTATAGGGACGGACGGACTCCACAAGGTGTTTTAGAGCTAGAAATAG      | 4      |
| <i>Erd1-B</i>    | TAATACGACTCACTATAGGGTGGCACATACATCTTGACCGTTTTAGAGCTAGAAATAG       | 4      |
| <i>Prrt2-A</i>   | GAAATTAATACGACTCACTATAGGGCTGCAGCAGCTGGTTGAGGGTTTTAGAGCTAGAAATAGC | 5      |

|                  |                                                                      |   |
|------------------|----------------------------------------------------------------------|---|
| <i>Prrt2-B</i>   | GAAATTAATACGACTCACTATAGGGGCCAAGCTCTTAAGCATCGGTTTTAGAGCTAGAAATAGC     | 5 |
| <i>Prrt2-C</i>   | GAAATTAATACGACTCACTATAGGGCCTCCTGCGTCATCAACTTGTTTTAGAGCTAGAAATAGC     | 5 |
| <i>Prrt2-D</i>   | GAAATTAATACGACTCACTATAGGCAGGCAGGGGAGGAATGGAAGTTTTAGAGCTAGAAATAGC     | 5 |
| <i>ArntL-A</i>   | TAATACGACTCACTATAGGGGCTGGCCACCCACAAAGATGGTTTTAGAGCTAGAAATAG          | 5 |
| <i>ArntL-B</i>   | TAATACGACTCACTATAGGGGCAGTCGTCGAATTGCAACGGTTTTAGAGCTAGAAATAG          | 5 |
| <i>ArntL-C</i>   | TAATACGACTCACTATAGGGGTTTTCTCGGCACGCGATAGAGTTTTAGAGCTAGAAATAG         | 5 |
| sgRNA-R          | AAAAGCACCGACTCGGTGCC                                                 |   |
| <i>Cas9</i> mRNA | F TAATACGACTCACTATAGGGAGATTCAGGTTGGACCGGTG<br>R GACGTCAGCGTTCGAATTGC |   |

### Primers used for genotyping.

| Locus          | Sequence (5'-3')                   | Product (bp) | Figure |
|----------------|------------------------------------|--------------|--------|
| <i>Tyr</i>     | Outer F: GTTATCCTCACACTACTTCTG     | 807          | 2      |
|                | Outer R: GTAATCCTACCAAGAGTCTCA     |              |        |
|                | Inner F: TCCTCACACTACTTCTGATG      | 788          | 2      |
|                | Inner R: GTCTCAAGATGGAAGATCAC      |              |        |
| <i>Eif2s3y</i> | Outer F: ATCACAGGAATCTGGAAGC       | 834          | 4      |
|                | Outer R: CTACTAAGCAACTGTCCATC      |              |        |
|                | Inner F: CAGGCTCACAGAGGTCTA        | 514          | 4      |
|                | Inner R: ACTCATCAGGTGTACTACTTC     |              |        |
| <i>Zfy1</i>    | Outer F: CACAATAAGAAATATATGC       | 799          | 4      |
|                | Outer R: CAGATAATCCTCACAGTTGATTTGT |              |        |
|                | Inner F: GTTACATAACCTAAAAGTAGAC    | 575          | 4      |
|                | Inner R: TATAGGATCAGTGATGACTTCTG   |              |        |
| <i>Ubel1y1</i> | Outer F: GCAAAGGCACAGATTAGAC       | 769          | 4      |
|                | Outer R: GGTTGTCAGTAGCAGGAG        |              |        |
|                | Inner F: TGGAGGCATTGTCAGTCA        | 625          | 4      |
|                | Inner R: ATGGCATCAGAAGCACAC        |              |        |
| <i>Kdm5d</i>   | Outer F: GCAGGCTACACAGGAGTA        | 491          | 4      |
|                | Outer R: AGGGACAGTAACAGGCATA       |              |        |
|                | Inner F: TTGGTGAGATGGCTGACT        | 457          | 4      |
|                | Inner R: GGACAGTAACAGGCATATGA      |              |        |
| <i>Ddx3y</i>   | Outer F: CACTATACTACCAAGCCACAT     | 684          | 4      |
|                | Outer R: CCAAGACATCCAATCTCATAAG    |              |        |
|                | Inner F: TTCTCACAATGTAGCTCAGT      | 512          | 4      |
|                | Inner R: AGGTAAGTAGGTAGACAGATTC    |              |        |
| <i>Usp9y</i>   | Outer F: AGATGTAAGTTCAGCTAGGT      | 875          | 4      |
|                | Outer R: CACACTTTCTACTAACAGTCAC    |              |        |
|                | Inner F: GTTGGGTATGTCTTTAGGTT      | 702          | 4      |

|                           |                                 |      |   |
|---------------------------|---------------------------------|------|---|
|                           | Inner R: CATGAAGGACAACAGGTAA    |      |   |
| <i>Sry</i>                | Outer F: GCACATTTTGGTCAGTGGCT   | 632  | 4 |
|                           | Outer R: GCTCTACTCCAGTCTTGCCT   |      |   |
|                           | Inner F: GTTCAGCCCTACAGCCACATG  | 355  | 4 |
|                           | Inner R: GCAGGCTGTAAAATGCCACTC  |      |   |
| <i>Prrt2-<br/>Exon3</i>   | Outer F: GGAGGGATATGGAAACACAT   | 937  | 5 |
|                           | Outer R: GATGCCAAGACAATGGAAGT   |      |   |
|                           | Inner F: TTTCCACCTGATCCCTTCTG   | 776  | 5 |
|                           | Inner R: GAGGTCCAGAGAATTTGGGA   |      |   |
| <i>ArntL-<br/>Exon 13</i> | Outer F: CCAGTACCTCCAATTTCACTTC | 1117 | 5 |
|                           | Outer R: CAGAGACTCACATCACTTGTC  |      |   |
|                           | Inner F: ATACATTCTAGTCCCTCAGC   | 950  | 5 |
|                           | Inner R: GGTACAATCACAGCTTACTG   |      |   |

### Primers used for off-target analysis.

| sgRNA       | Locus          | Sequence                                               | Product (bp)                                        |     |
|-------------|----------------|--------------------------------------------------------|-----------------------------------------------------|-----|
| sgRNA-Tyr-B | chr17:57065718 | F: CCATTACCTCATAGGACCT<br>R: GTTGCTGATCTGAAGAAGTG      | 617                                                 |     |
|             | chr6:138140489 | F: GGTATTCACAGCAATAGAGC<br>R: GCAGTGACTTCTCATCTTGT     | 777                                                 |     |
|             | chr4:138750107 | F: TTCTCTATCTGAGGCATCTG<br>R: GACTCTACTGTTGTAGGACC     | 701                                                 |     |
|             | chr2:32395585  | F: AACTCCTGCCCTACTTAGAAG<br>R: CAATGATGACCTGTAACCTCGTG | 748                                                 |     |
|             | chr9:23096850  | F: AAGATGCCTCCTGTTCTGAAG<br>R: CAATCCATCATGCCTCTGAAG   | 671                                                 |     |
|             | chr17:24453551 | F: CTGTCTGGAACCTCACTCTAT<br>R: GACATTGGTTCTCAGACTTCC   | 764                                                 |     |
|             | chr9:96832929  | F: GCTAATGCTAAGCCCTAACTG<br>R: CATTCTCTGTGTCTGACTCTG   | 633                                                 |     |
|             | chr15:79169441 | F: GTATATGTGTATGCCTGCGTC<br>R: ACAGAGTGAGTTCTAGGACAG   | 1075                                                |     |
|             | chr4:86233378  | F: AGTGCGATACCTTACTGTCTC<br>R: CATGTAGCAGCCTAGTTCTTC   | 659                                                 |     |
|             | chr6:115975395 | F: GATACTTCTGGTCTTCAGCAG<br>R: CATCCACAGCAGATACTAAGG   | 625                                                 |     |
|             | sgRNA-Tyr-C    | chr8:73203311                                          | F: GCCTGTAATGATTGGACTGT<br>R: GGACCTAACTATTGTGGGAAG | 760 |
|             |                | chr10:55107975                                         | F: CATAGACTGTAGGACCAAGAC<br>R: ACCCTTACCACCTGTTTATG | 625 |
|             |                | chr10:116978236                                        | F: AGGAGCTGCATCATCTTATG                             | 680 |

|                 |                                                          |     |
|-----------------|----------------------------------------------------------|-----|
|                 | R: ACAATCTGGAAGGCGAATAG                                  |     |
| chr10:124330321 | F:CAACCTCAAGAGTCAGACAAG<br>R:CCAGCAGTGAATTTCCATCAG       | 731 |
| chr17:8532910   | F:CTGTGTATTTGTGGGACCTATG<br>R:GATTAGTCCATCAGAAGCAGAG     | 748 |
| chr16:57712501  | F:GTCCTCTACTATTCTGTGTCTG<br>R:GATTGGTCTCTGTATAGTTGGC     | 639 |
| chr17:44031368  | F:CCAATGACATACTCAGTGCTC<br>R:AGAGATGAGAGTTGGAGACAG       | 743 |
| chr3:6828323    | F:CTCTACTTCCACTGAGGGTAC<br>R:GGACAATTCTCTTGGTTCTCC       | 703 |
| chr11:28415232  | F:TAACCTACCTTACCACCATCC<br>R:GCCTATTGACCAGAGTTAGTG       | 718 |
| chr1:33799882   | F:TAGTGTCACCTAGTAGAGTCC<br>R:GAGTAGCCAGTATGCTTAACC       | 857 |
| chr15:74536351  | F: AGACAGAGGAAGCATTGAG<br>R: CTCCAGGTCATACTGAG           | 516 |
| chr18:43788370  | F: CCTGGATATGGCAGTCTCTA<br>R: CTGATTCTCTGAGAGGTGGTA      | 957 |
| chr15:61581619  | F: GTGAAGGACTCAGGTTACTA<br>R: ATGATACAGTGGTAGCAGAC       | 799 |
| chr13:39330053  | F:CATGGCTCAGGTACATGCTATGA<br>R:GGGCTCCGATGGTGCCTGTC      | 998 |
| chr14:80206603  | F:GTGGGCACAGTTGCTGATGAT<br>R:GCAGTTCCAACCAATGCTCAC       | 752 |
| chr5:36335565   | F:ATGAATCAGACCTTGCCCGTCAC<br>R:CATGCTGGGTGAAGGCAAGATC    | 653 |
| chr8:85681387   | F:TGGACCATTAGACAGTGGGAGA<br>R:AGGCAGAAGAGGGTGAGTGGT      | 941 |
| chr3:98944708   | F:TACCTTGGGTCTTATGGTTGTT<br>R:TTGGCAGTAGTTGATGAGGAGAAGT  | 766 |
| chr6:42584574   | F:TCTGTAAGGACACGAGTTAGGGATC<br>R:TTTGCTCCTATGACCTGGGTTCC | 893 |
| chr10:18410911  | F:GTACTACTTGAATTAGCAGCCACTGC<br>R:AAGTAGCCATGCAAAGCCAAGC | 694 |
| chr8:108702504  | F: GCTTTGATGTACTGGGAATC<br>R: GCTTAGAATGGAGGTCACCT       | 757 |
| chrX:130677312  | F: GACAGAAGGATGAGGAATGA<br>R: CCAACCACTATTGAACTCAC       | 700 |
| chr3:130295069  | F: CTTGTCATAGCAGTGTCTG<br>R: GCTCCTTGAGAGTCCATTAG        | 643 |
| chr7:123982528  | F:TAGCCCGCAGTGCCTCCACAG<br>R:CTAGTCGCGGCGGCACCTGCTC      | 766 |

sgRNA-Tyr-D

sgRNA-Tyr-E

|                        |                 |                                                         |      |
|------------------------|-----------------|---------------------------------------------------------|------|
|                        | chr3:133082201  | F:CCTGCATCCAGCTAAATGGCACA<br>R:AGGCTGCCATACCTCCAACAA    | 1045 |
|                        | chrX:147311924  | F:CAGCCAAGGTGGGCACAAGGT<br>R:CAGGCATCCTCACAGGAAATTATGG  | 830  |
|                        | chr1:168151597  | F:TGAGCATGTCTGACTTCCCAGTT<br>R:AAGGTTACATTATGCCTCAGTTGT | 745  |
|                        | chr5:50071052   | F:CAGGGACAGCATCCAGGTTTAT<br>R:GTGCCATCAATCACTAAGGCAAATC | 782  |
|                        | chr2:7777791    | F:AAGCTGAAAGTGACTGGGAGA<br>R:CTGGGTGTATTTGTGCCTGTGT     | 973  |
|                        | chr10:84425609  | F:CATTTGTCAAACAGGAGCCACG<br>R:TGGTAATGAGGTAGGGACAGGC    | 807  |
| sgRNA- <i>Prrt2</i> -B | chr16:19639092  | F:GGTAGTATTGCCAGATCCAA<br>R:CGGGTTCAAGTGATTCTTCTG       | 631  |
|                        | chr8:8862302    | F:GTTGAGGATCACTGTTCTACC<br>R:CTTGTCTGTTTGTAGGTTGG       | 763  |
|                        | chr7:142439417  | F:ACAGACCTACAGAAGTGACTC<br>R:GCACGGAATCTATACAGAGAC      | 677  |
|                        | chr16:18400530  | F:ACAGACCTACAGAAGTGACTC<br>R:CAGAGACAGGCTAAGATATTGC     | 663  |
|                        | chr3:1322473581 | F:GAGTGTCTTGATGGGCTAGA<br>R:CTCTGTGATTCTGGTATCTG        | 967  |
|                        | chr7:9980144    | F:ACAAGTCTGGAGATTCCTTC<br>R:GATGTTCTTGGTGTGATTC         | 937  |
|                        | chr10:63847987  | F:CCCACCATCAACCTAGATTG<br>R:GTCCTCACAGAACTCTCATT        | 706  |
|                        | chr8:42993888   | F:CCAGAGCAGTTACTTCAGAAG<br>R:GGCTAGTGGTTACAGTATTGG      | 944  |
|                        | chr13:43492573  | F:GCACAGACCTAGCTAATCTCG<br>R:CTTCCTTCCTTCCTTCCTCC       | 806  |
|                        | chr14:3502008   | F:GGACATGGATGAAGTTGGAAG<br>R:TCAGTAATCTACAGAGGAGGTG     | 696  |
|                        | chr20:61736084  | F:ATGACCTAATCCATGCTCCAG<br>R:GAACTCCTGACCTCAGATGAT      | 890  |
|                        | chr5:72228276   | F:CAATTCAGTGGGAAGTATAGGG<br>R:GACACAGTTGTTACCATCTAC     | 882  |
| sgRNA- <i>Prrt2</i> -C | chr7:83976766   | F:CCTAAACTCCCTTGACTTCTG<br>R:CCTGTTGTAACTCACTTCCTG      | 958  |
|                        | chr1:190035638  | F:GATACAGACTCAGAGGAATGG<br>R:CAGGAGGTCTTCATCTTCAAC      | 703  |
|                        | chr9:69194244   | F:GGTAGGCAAGTATGGTAAAGG<br>R:GGATTGTATCCTGGTGACTTC      | 605  |
|                        | chr3:19342682   | F:GATCACCTGAGGTTAGGAGTT                                 | 708  |

|               |                 |                            |     |
|---------------|-----------------|----------------------------|-----|
|               |                 | R:CAGATTCTAGCTGAGTGGATG    |     |
|               | chr15:40107119  | F:CCTCATCATCTTCATGTCGAG    | 792 |
|               |                 | R:CATCTACTCACTTCCTCTAGC    |     |
|               | chr20:61058621  | F:GGGAAGTGAATGAACTGATGG    | 700 |
|               |                 | R:CCTGAAGTGAGGCAATAAGAG    |     |
|               | chr14:112810197 | F:GAGAACAGTGTCCCTTGATGAG   | 897 |
|               |                 | R:GGAGGTAGAGGTTGTAGTGAG    |     |
|               | chr10:85811043  | F:CAACAGACAAGGCTAACTCAG    | 637 |
|               |                 | R:GACAGAGTGAGACTCCATTAC    |     |
|               | chr3:88667957   | F:GGTAAGTCTGGAACCAATAGG    | 635 |
|               |                 | R:CAGTCAAGCAGTATCTCTGAG    |     |
|               | chr7:96903885   | F:CTCCTTACATCTCATTGGTCAG   | 970 |
|               |                 | R:CTATCCATCCTTCGTGATCTG    |     |
|               | chr3:10010150   | F:CTCATCCTGTTCTACACCAAG    | 665 |
|               |                 | R:GAGTAAGGGAATCCATCTCTC    |     |
|               | chr2:37733632   | F:CCTACTATACACAAGGTACTGG   | 794 |
|               |                 | R:CTAGAGGAAGACTGCTAAGTG    |     |
|               | chr12:127960318 | F:GCTCACCATATCCAACCTCATACT | 905 |
|               |                 | R:CTCCATCCACTCTCCATCTAT    |     |
| sgRNA-Prnt2-D | chr5:116240088  | F:CGGTTCTCTCCACTAACATTC    | 765 |
|               |                 | R:GTTAGAGGCATCAGGGATTTTC   |     |
|               | chr5:151113455  | F:CCCACCATCAACCTAGATTTG    | 706 |
|               |                 | R:GTCCTCACAGAACTCTCATTC    |     |
|               | chr1:62103725   | F:GTGTGGACTGAGTTCTATAAGG   | 746 |
|               |                 | R:GATCACTTGAGGTCAGGAGTT    |     |
|               | chr1:146757199  | F:GGCAGCACTTGGCATTTAACC    | 760 |
|               |                 | R:CTAGGCTCGGCTTGGATGTTC    |     |
|               | chr2:141699162  | F:GCAGAGATCAGTTGCTTGTTTC   | 638 |
|               |                 | R:CTGGGCTAGTGTTCTTAATGG    |     |

**Primers used for validation of the off-target site from whole-genome analysis.**

|               |                |                        |     |
|---------------|----------------|------------------------|-----|
| sgRNA-Prnt2-C | chr4:146185910 | F:AAGGATACAAGGATCTCAGG | 999 |
|               |                | R:ACCACTCCGAAGATAATAGC |     |
