# Supplementary material for: One-step generation of complete gene knockout mice and monkeys by CRISPR/Cas9-mediated gene editing with multiple sgRNAs
Source: PubMed Central journal article supplement (PMC5518993; doi:10.1038/cr.2017.81), 2017-06-06
Supplement: cr201781x8.pdf [file cr201781x8.pdf]

## Supplementary information, Data S1

C-CRISPR-mediated complete gene knockout in mice and monkeys.

### Gene deletion in mice

1. Choose the key exon of the gene for targeting.
2. Within DNA sequence of the key exon, design 4 to 6 adjacent sgRNAs (spaced 10-200 bps) with minimal off-target effects according to online software (<http://crispr.mit.edu/>).

**Note:** For genes located in only one allele, such as genes in Y chromosome, 2 to 3 adjacent sgRNAs are required. For genes located in autosomes, 4 to 6 adjacent sgRNAs are required.

**Note:** The majority of sgRNAs for gene editing in mice are very efficient. Therefore, we recommend using these sgRNAs directly for gene editing without pretest.

3. Synthesize DNA oligos for each sgRNA according to sgRNA sequence. Primers for PCR amplification are listed in the table below.

| Name    | Sequence (5' to 3')                                    |
|---------|--------------------------------------------------------|
| sgRNA F | TAATACGACTCACTATAGGG-sgRNA (20 bp)-GTTTTAGAGCTAGAAATAG |
| sgRNA R | AAAAGCACCGACTCGGTGCC                                   |
| Cas9 F  | TAATACGACTCACTATAGGGAGATTTTCAGGTTGGACCGGTG             |
| Cas9 R  | GACGTCAGCGTTCGAATTGC                                   |

4. Make the template for *in vitro* transcription of sgRNA:

A. Set up the following reaction mixture to amplify the DNA fragment from px330 for the sgRNA scaffold.

| Component                         | Volume |
|-----------------------------------|--------|
| 10× PCR Buffer for KOD -Plus- Neo | 5µl    |
| 2 mM dNTPs                        | 5µl    |
| sgRNA F: (10µM)                   | 2µl    |
| sgRNA R: (10µM)                   | 2µl    |
| KOD -Plus- Neo (1 U/µl)           | 1µl    |
| px330 (100ng/µl)                  | 0.5µl  |
| 25 mM MgSO <sub>4</sub>           | 3µl    |
| ddH <sub>2</sub> O                | 31.5µl |
| Total                             | 50µl   |

B. Perform PCR using the following cycling conditions:

| Cycle number | Denature    | Anneal     | Extend      |
|--------------|-------------|------------|-------------|
| 1            | 95 °C, 5min |            |             |
| 2-34         | 95 °C, 30s  | 60 °C, 30s | 72 °C, 30s  |
| 35           |             |            | 72 °C, 5min |

5. Purify T7-sgRNA PCR products, and then use them as the templates for IVT using

the MEGAscript T7 kit according to the kit protocol.

6. Purify the sgRNA individually using the MEGAclean kit and elute the RNA in 100  $\mu$ l of TB buffer. Determine the RNA concentration by the Thermo Scientific NanoDrop 2000 spectrophotometer, and store it at -80  $^{\circ}$ C.

7. Purchase or synthesize *Cas9* mRNA as following:

A. Set up the following reaction mixture to amplify the DNA fragment from px260 for *Cas9*.

| Component                                 | Volume       |
|-------------------------------------------|--------------|
| 10 $\times$ PCR Buffer for KOD -Plus- Neo | 5 $\mu$ l    |
| 2 mM dNTPs                                | 5 $\mu$ l    |
| <i>Cas9</i> F: (10 $\mu$ M)               | 2 $\mu$ l    |
| <i>Cas9</i> R: (10 $\mu$ M)               | 2 $\mu$ l    |
| KOD -Plus- Neo (1 U/ $\mu$ l)             | 1 $\mu$ l    |
| px260 (100ng/ $\mu$ l)                    | 0.5 $\mu$ l  |
| 25 mM MgSO <sub>4</sub>                   | 3 $\mu$ l    |
| ddH <sub>2</sub> O                        | 31.5 $\mu$ l |
| Total                                     | 50 $\mu$ l   |

B. Perform PCR using the following cycling conditions:

| Cycle number | Denature              | Extend                 |
|--------------|-----------------------|------------------------|
| 1            | 95 $^{\circ}$ C, 5min |                        |
| 2-34         | 95 $^{\circ}$ C, 30s  | 68 $^{\circ}$ C, 5min  |
| 35           |                       | 72 $^{\circ}$ C, 15min |

8. Purify *T7-Cas9* PCR products and then use them as the templates for IVT using the mMACHINE Mmachine T7 kit according to the kit protocol.

9. Purify the mRNA using the MEGAclean kit and elute the RNA in 100  $\mu$ l of TB buffer. Determine the RNA concentration by the Thermo Scientific NanoDrop 2000 spectrophotometer, and store it at -80  $^{\circ}$ C.

**Note:** *Cas9* mRNA quality is the key for efficient DNA cleavage. Avoid *Cas9* mRNA degeneration.

10. *Cas9* mRNA (50 ng/ $\mu$ l) and sgRNAs (20-50 ng/ $\mu$ l for each sgRNA) are mixed and injected into the cytoplasm of fertilized eggs.

**Note:** The total amount of sgRNAs should not exceed 200 ng/ $\mu$ l.

11. The injected zygotes are transferred into oviducts of pseudopregnant ICR females at 0.5 dpc. The embryos at different stages or mice could be directly used for phenotypic analysis.

**Note:** Collect samples of embryos or mice for genotyping analysis to ensure complete gene deletion. Usually, more than 80% gene-edited embryos exhibited

large-fragment exon deletion at the target locus. Otherwise, design new sgRNAs to replace the sgRNAs with low DNA cleavage activity.

### **Gene deletion in monkey**

1. Choose the key exon of the gene for targeting.
2. Within DNA sequence of the key exon, design ~ 20 sgRNAs with minimal off-target effects according to online software (<http://www.rgenome.net/>).
3. Synthesize sgRNAs individually as above method.
4. *Cas9* mRNA (100 ng/μl) and individual sgRNA (50 ng/μl for each sgRNA) are injected into monkey zygotes.
5. The injected zygotes are cultured to 8-cell stage and used for genotyping analysis. Four sgRNAs with highest DNA cleavage efficiency was selected for following gene editing.
6. *Cas9* mRNA (100 ng/μl) and sgRNAs mix (50 ng/μl for each sgRNA) are injected into monkey zygotes. And the embryos are transferred to surrogates.
